# Supplementary material
Source: MDPI journal article supplement (https://www.mdpi.com/2071-1050/14/15/9451)
Supplement: s1 [file s1]

# Supporting Information of “Reduction and Degradation of Paraoxon in Water using Zero-valent Iron Nanoparticles”

V.A. Okello<sup>1\*\*</sup>, I.O. K’Owino<sup>2</sup>, K. Masika<sup>2</sup>, V.O. Shikuku<sup>3\*</sup>

<sup>1</sup> Machakos University, Department of Physical Sciences, P. O. Box 136-90100, Machakos, Kenya

<sup>2</sup> Masinde Muliro University of Science and Technology, Department of Pure and Applied Chemistry, P. O. Box 190 Kakamega, Kenya

<sup>3</sup> Kaimosi Friends University College, Department of Physical Sciences, P.O. Box 385-50309 Kaimosi, Kenya

\*\*V.A Okello, Email address: [vokello@mksu.ac.ke](mailto:vokello@mksu.ac.ke)

\*V.O Shikuku, Email address: [vshikuku@kafuco.ac.ke](mailto:vshikuku@kafuco.ac.ke)

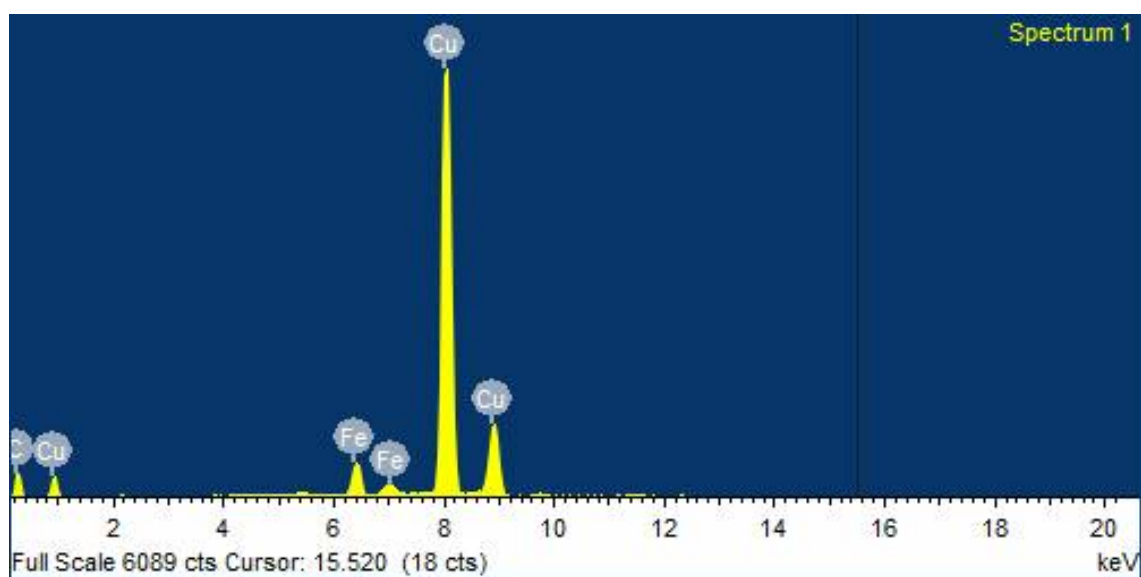

**Figure S1:** Energy Dispersive X-ray Analysis (EDXA) image of freshly prepared zero-valent iron NPs.

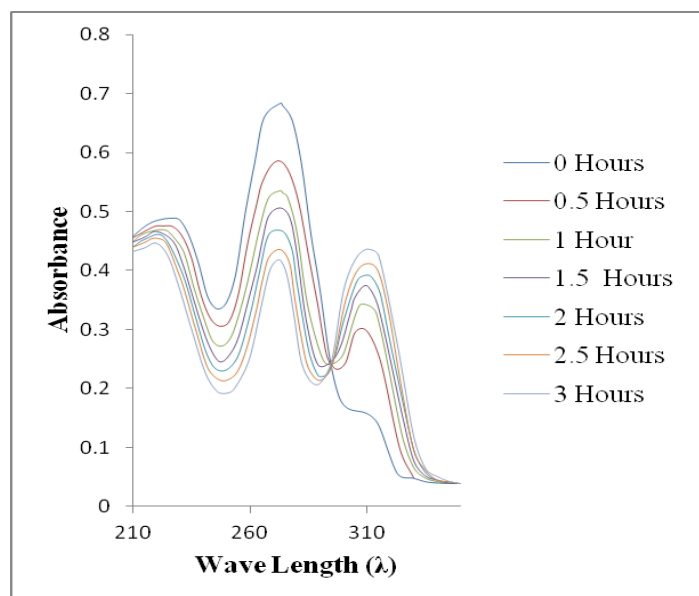

**Figure S2.** Evolution of Paraoxon concentration with time after incubation of 15 mg L<sup>-1</sup> of Paraoxon with 2% ZVI NPs for 3 hours.
